# Supplementary material
Source: Springer Nature journal article supplement (https://www.springermedizin.de/resource/supplementary/12955_2012_1129_MOESM1_ESM.pdf/9559340)
Supplement: MOESM1 [file 9559340]

| Child                             |                                  |
|-----------------------------------|----------------------------------|
| Social                            | Emotion                          |
| 1. Teasing                        | 1. Self confidence               |
| 2. Bullying                       | 2. Embarrassment                 |
| 3. Social comparison              | 3. Negative affect (angry/sad)   |
| 4. Social exclusion               | 4. Worry about height            |
| 5. Stigma                         | 5. Bothered about height         |
| 6. Juvenalisation                 | 6. Feeling hurt                  |
| 7. Positive comparison            | 7. Isolation                     |
| 8. Social support/acceptance      | 8. Satisfaction with height      |
| 9. Future                         | Coping                           |
| Physical                          | 1. Acceptance                    |
| 1. Limitation in daily activities | 2. Ignoring/blocking out         |
| 2. Energy                         | 3. Aggression/acting out         |
| 3. Clothing                       | 4. Denial                        |
| 4. Recreational activities        | 5. Seeking/receiving support     |
| Treatment                         | Future                           |
| 1. Expectations about treatment   | 1. Work                          |
| 2. External influences            | 2. Not being left out            |
| 3. Psychological effect           | 3. Better life                   |
| 4. Treatment administration       | 4. Future partner                |
| 5. Side effects                   | Beliefs                          |
| 6. Benefits of treatment          | 1. Belief/attitudes about height |
